# Supplementary material
Source: Springer Nature journal article supplement (https://www.springermedizin.de/resource/supplementary/12955_2003_388_MOESM2_ESM.pdf/9560290)
Supplement: MOESM2 [file 9560290]

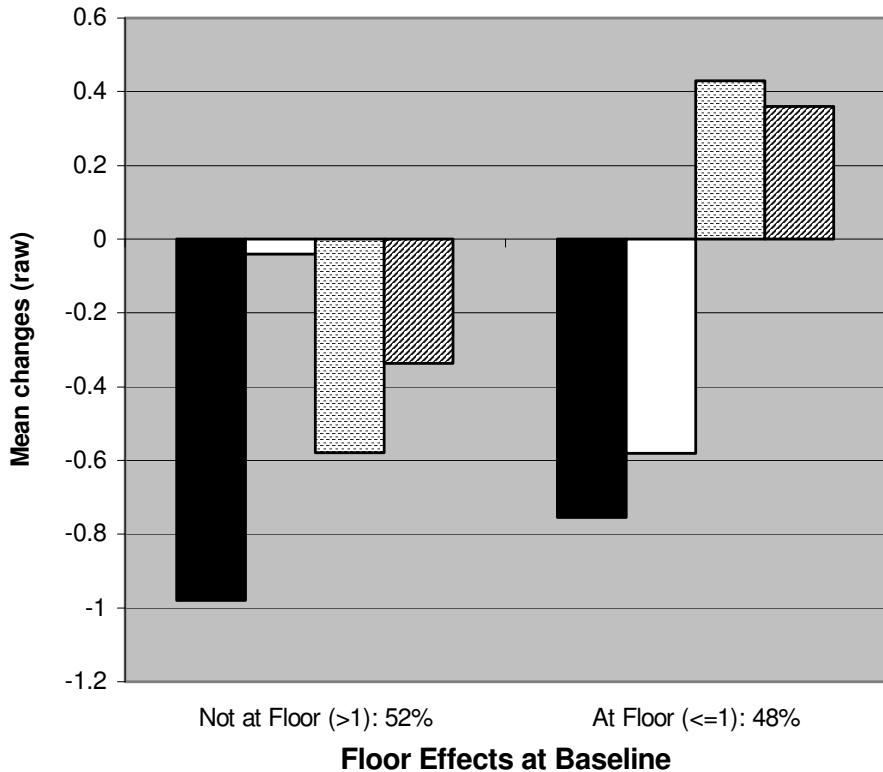

■ Change (insulin glargine)  
 □ Change (NPH)  
 ▨ Status (insulin glargine)  
 ▩ Status (NPH)

---

**Treatment**  
 p = 0.01  
**Floor**  
 p = 0.005  
**Q're**  
 p < 0.0001

---

**Treat x Floor**  
 p = 0.030  
**Treat x Q're**  
 p = 0.017  
**Floor x Q're**  
 p < 0.0001  
**Treat x Floor x Q're**  
 NS

---

N = 192
